# Supplementary material
Source: Frontiers journal article supplement (https://www.frontiersin.org/articles/534939)
Supplement: Table_3.XLS [file Table_3.XLS]

## Sheet: Translate from logfO2 value
									NA01						NA03						NA06							NA18							14ZA10						14ZA18						14ZA19B
								Sample	logfO2-NNO	ToC	P bar	DQFM		Sample	logfO2-NNO	ToC	P bar	DQFM		Sample	logfO2-NNO	ToC	P bar	DQFM		Sample	logfO2-QFM	ToC	P bar	DQFM		Sample	logfO2-NNO	ToC	P bar	DQFM		Sample	logfO2-QFM	ToC	P bar	DQFM		Sample	logfO2-QFM	ToC	P bar	DQFM
	USER INPUT							A-1	-17.9602	638.91	3793.33	0.31941		A-1	-18.0704	635.702	3491.92	0.340748		A-1	-17.7931	644.698	3741.38	0.311145		Bt1-3	-19.8838	620.362	3592.22	-0.989371		E-26	-18.4922	623.285	2562.01	0.412634		H-117	-20.6865	604.256	1221.17	-1.00672		C-30	-20.2857	615.633	1261.55	-0.994401
	logfO2	-18.4952						A-2	-18.2953	627.161	4104.88	0.325982		A-2	-18.1621	632.359	3648.78	0.339222		A-2	-18.1875	631.512	3647.31	0.340927		Bt1-6	-20.2075	610.559	3699.45	-0.999857		S-113	-18.3875	626.135	2909.11	0.389121		E-89	-20.4833	610.815	964.292	-0.999581		C-25	-20.682	604.007	1348.32	-1.007
	Temp (°C)	624.195						A-3	-18.6078	617	4072.39	0.347408		A-7	-18.2013	630.259	4115.67	0.319499		B-17	-18.9561	604.933	4650.67	0.341182		Bt1-9	-20.419	606.023	3182.92	-1.00479		Q-98	-18.46	623.971	2781.41	0.399995		E-80	-20.6504	604.625	1441.55	-1.00632		C-26	-20.3677	612.944	1365.76	-0.997285
	P (bars)	1960.74						A-4	-18.4718	622.225	3591.16	0.361911		A-14	-17.6102	650.652	3955.18	0.289446		B-18	-18.6883	614.206	4193.66	0.346635		Bt1-11	-20.2977	608.492	3520.71	-1.0021		K-61	-18.2005	633.014	2507.63	0.39589		H-114	-20.6265	606.004	1206.31	-1.00481		G-93	-19.8393	628.154	1471.47	-0.981197
								A-5	-17.7608	646.321	3443.24	0.323032		A-15	-17.9691	638.55	3827	0.318392		B-31	-18.5951	617.949	3751.04	0.362131		Bt1-12	-20.2787	609.504	3366.41	-1.001		R-105	-18.5411	621.182	2864.8	0.401332		D-67	-20.7125	603.55	1211.04	-1.0075		C-29	-20.4985	609.451	1275	-1.00106
								A-15	-17.7762	644.878	3974.12	0.299146		A-16	-18.1321	632.929	3904.03	0.325165		C-33	-18.3762	624.451	4129.93	0.329922		Bt1-17	-19.4985	631.328	3783.02	-0.977909		K-62	-18.1462	634.904	2463.43	0.394382		D-71	-20.7911	601.213	1252.42	-1.01008		G-112	-19.6292	633.768	1704.46	-0.975397
	OUTPUTS							A-16	-18.3315	625.631	4303.43	0.318765		B-19	-17.4371	656.647	3992.98	0.276656		C-34	-18.4814	621.141	4050.88	0.340405		Bt1-19	-20.3087	608.896	3280.76	-1.00166		S-112	-18.8052	612.785	2794.9	0.422071		E-86	-20.7741	600.889	1522.97	-1.01043		G-97	-20.6218	605.806	1317.46	-1.00503
	Temp (K)	897.345						B-23	-18.4299	622.992	3949.61	0.341999		B-20	-17.6021	650.82	4021.47	0.285838		C-40	-18.5593	620.166	3117.99	0.390346		Bt2-1	-20.4699	604.399	3238.83	-1.00657		L-69	-18.671	617.265	2691.99	0.4182		E-87	-20.6143	605.979	1330.83	-1.00484		A-9	-20.311	614.778	1301.62	-0.995315
								B-24	-18.3188	626.433	4075.45	0.328887		B-23	-18.4145	623.984	3661.12	0.354861		C-42	-18.1011	633.927	3927.46	0.322075		Bt2-2	-20.3555	606.985	3468.52	-1.00374		D-20	-17.9995	639.927	2418.45	0.386755		E-82	-20.7548	601.484	1505.78	-1.00978		G-96	-20.38	612.736	1316.34	-0.997508
	BUFFER VALUES AT GIVEN T			fO2 IN TERMS OF GIVEN BUFFER				B-25	-17.455	655.837	4096.51	0.272996		C-33	-17.3786	658.857	3911.07	0.276714		C-43	-18.0835	634.139	4150.24	0.310377		Bt2-3	-20.4138	606.131	3195.91	-1.00467		F-30	-18.2391	631.684	2531.72	0.397311		E-79	-20.6598	604.598	1360.48	-1.00635		G-95	-19.8351	629.033	1225.6	-0.980285
	Buffer	logfO2		Buffer	Δ			B-26	-17.6943	647.985	3809.5	0.301622		C-34	-18.3937	623.638	4271.42	0.324235		C-44	-18.2006	630.407	4042.86	0.322924		Bt2-6	-20.0814	615.355	3326.72	-0.994698		D-21	-18.1351	635.294	2451.85	0.394196		H-116	-20.3428	613.634	1375.93	-0.996544		A-11	-20.0305	623.439	1152.98	-0.986126
	QIF (Low T)	-25.316		QIF (Low T)	6.8208			B-34	-18.0346	636.57	3689.21	0.329107														Bt2-10	-20.1901	611.765	3467.2	-0.998555		L-68	-18.6687	616.784	3023.67	0.402041		E-88	-20.4123	612.1	1217.54	-0.998194		G-119	-19.7627	630.625	1414.39	-0.978635
	QIF (High T)	-25.2967		QIF (High T)	6.80153			B-45	-18.4122	624.075	3652.18	0.355141														Bt3-7	-20.1747	612.036	3524.76	-0.998263		E-24	-18.7298	614.883	2986.06	0.407855		E-84	-20.433	611.255	1300.9	-0.999105		C-27	-20.7593	601.198	1559.32	-1.01009
	IW	-23.8116		IW	5.31637			B-46	-18.693	614.42	3975.31	0.35753														Bt4-7	-20.1746	612.599	3339.17	-0.997656		F-33	-18.4749	623.652	2681.23	0.405775		H-119	-20.5886	605.779	1643.11	-1.00506		G-113	-20.0488	621.362	1659.93	-0.988313
	WM	-23.3668		WM	4.8716			B-47	-17.4517	656.351	3867.65	0.283394														Bt5-2	-20.0468	615.582	3586.61	-0.994456		Q-97	-18.3264	628.555	2669.77	0.396517		H-115	-20.3457	613.878	1266.04	-0.996281		A-10	-20.2701	616.578	1098.17	-0.993391
	IM	-23.7205		IM	5.22525			B-48	-18.2016	630.677	3863.96	0.331513														Bt5-3	-20.1576	611.967	3712.75	-0.998337		M-75	-18.5653	620.596	2745.27	0.408668		E-83	-20.6314	605.365	1373.88	-1.00551		G-111	-19.8135	628.671	1555.32	-0.98066
	CoCoO	-19.7077		CoCoO	1.21244			B-53	-18.2987	627.106	4069.76	0.327881														Bt5-4	-20.1643	611.901	3670.14	-0.998408		E-25	-18.5916	619.725	2755.19	0.409924		E-85	-20.4234	611.68	1251.09	-0.998646		G-94	-19.7394	630.885	1558.44	-0.978366
	FMQ (Low T)	-18.9368		FMQ (Low T)	0.441614			B-54	-18.4351	622.849	3934.93	0.343033														Bt5-6	-20.2164	611.247	3386.22	-0.999115		F-34	-18.5069	622.522	2731.82	0.40546		D-70	-20.684	603.022	1660.91	-1.00808		G-120	-20.1382	619.082	1545.36	-0.990727
	FMQ (High T)	-18.9921		FMQ (High T)	0.496835			C-56	-17.7631	644.943	4198.88	0.287766														Bt6-8	-19.9878	618.103	3326.16	-0.991766		R-107	-18.7301	614.657	3115.54	0.401609		E-81	-20.6286	604.913	1552.01	-1.006		G-92	-19.9166	625.64	1540.04	-0.983819
	NNO	-18.3215		NNO	-0.173718			C-57	-18.0033	637.364	3843.63	0.319795																				O-89	-18.6012	619.172	2900.51	0.403556								C-28	-20.3822	612.252	1456.54	-0.998029
	MH (Low T)	-14.0429		MH (Low T)	-4.45233			C-58	-17.7163	646.863	4019.43	0.293206																				L-70	-18.6117	618.584	3048.4	0.397119								G-114	-19.8838	623.833	2453.72	-0.985712
	MH (Med T)	-13.9823		MH (Med T)	-4.51297			C-69	-18.4676	622.477	3522.81	0.364925																				E-27	-18.2743	630.298	2659.98	0.393543								G-110	-20.4241	611.953	1153.33	-0.998352
	MH (High T)	-14.0412		MH (High T)	-4.454																											P-94	-18.0712	636.493	3011.31	0.363535
																																K-65	-18.431	625.49	2442.33	0.414303
																																A-2	-18.1676	633.975	2589.12	0.389851
																																M-76	-18.3777	626.849	2676.12	0.399606
																																O-86	-18.3824	626.877	2568.18	0.405068
																																R-103	-18.7312	615.245	2740.35	0.419839
																																S-109	-18.0512	637.779	2651.15	0.379227
																																L-67	-18.6305	618.369	2814.17	0.40964
																																R-106	-18.4911	622.693	2937.02	0.394578
																																J-56	-19.2371	598.728	3088.67	0.436014
																																N-80	-19.3216	596.079	3113.4	0.440311
																																F-31	-18.1126	635.755	2625.25	0.384508
																																I-53	-18.4378	624.325	3003.19	0.387914
																																H-47	-18.165	634.168	2524.82	0.392728
																																D-22	-18.6327	617.759	3135.96	0.394267
																																P-90	-18.2334	631.562	2716.67	0.38815
																																D-23	-18.3962	626.473	2538.36	0.407405
																																F-32	-17.9101	641.843	3073.02	0.350098
																																B-8	-18.4084	625.924	2626.82	0.403986
																																E-28	-18.2524	631.334	2477.31	0.400774
																																Q-96	-18.525	621.822	2796.72	0.40354
																																N-83	-18.4895	622.893	2847.9	0.39875
																																J-58	-18.4459	624.554	2709.97	0.402484
																																A-3	-18.5441	620.908	2970.56	0.396443
																																D-19	-17.8714	644.1	2528.6	0.373085
																																P-92	-18.7501	614.184	3014.63	0.407801
																																O-87	-18.3921	626.153	2807.88	0.394263
																																H-46	-18.6016	619.407	2751.26	0.410773
																																S-111	-18.4552	624.288	2686.71	0.40421
																																Q-99	-18.1769	633.452	2714.09	0.384544
																																H-43	-18.1259	635.076	2762.41	0.378898
																																K-64	-18.5269	621.699	2832.03	0.401972
																																J-59	-18.5451	621.282	2727.99	0.408166
																																S-108	-18.3423	627.224	3147.07	0.374795
																																G-36	-18.8211	612.276	2797	0.423011
																																I-51	-18.5837	620.033	2725.12	0.410847
																																O-88	-18.3909	625.971	2941.12	0.38781
																																S-110	-18.2518	630.711	2857.01	0.382694
																																E-29	-18.5722	620.442	2703.31	0.411139
																																Q-101	-18.2878	629.833	2670.3	0.393944
																																F-35	-18.3688	627.301	2583.31	0.403443
																																K-60	-18.4494	623.919	3018.89	0.387922
																																H-44	-18.0977	636.336	2580.12	0.385649
																																M-74	-18.3474	627.705	2762.12	0.393502
																																P-91	-18.1362	634.487	2907.18	0.372719
																																B-10	-18.6787	617.449	2431.51	0.431277
																																B-7	-18.9571	607.752	2921.54	0.425891
																																A-5	-18.2575	630.964	2595.24	0.395514
																																O-84	-18.1215	635.029	2877.51	0.373162
																																L-66	-18.8678	610.844	2763.49	0.427717
																																H-45	-18.4752	623.42	2812.24	0.399521
																																N-81	-18.8735	610.018	3153.89	0.409094
																																C-13	-18.2784	629.864	2835.96	0.385444
																																Q-100	-18.2558	630.584	2854.94	0.383051
																																L-71	-18.3469	627.823	2702.03	0.396335
																																J-54	-18.501	622.611	2791.99	0.402189
																																K-63	-18.2848	629.951	2659.07	0.39428
																																J-57	-18.3627	627.817	2396.24	0.411959
																																I-49	-18.1394	634.882	2609.9	0.387006
																																I-52	-18.7749	613.61	2881.57	0.415877
																																J-55	-18.1808	633.373	2682.76	0.386291
																																G-40	-18.7115	616.214	2538	0.428318
																																I-50	-18.3785	626.772	2707.13	0.398176
																																G-39	-18.6497	617.854	2750.86	0.413957
																																C-14	-18.4789	623.104	2928.46	0.394191
																																C-16	-18.1022	636.215	2560.98	0.386854
																																A-1	-18.0466	638.434	2358.31	0.392722
																																O-85	-18.1081	635.728	2731.7	0.379174
																																C-17	-18.8037	612.569	2955.48	0.414177
																																B-12	-18.1618	634.027	2671.67	0.385562
																																G-41	-18.6393	617.925	2909.86	0.405604
																																P-93	-17.9362	641.124	2975.18	0.3564
																																A-6	-18.9139	609.595	2633.85	0.437062
																																M-72	-18.2753	629.67	3011.83	0.376866
																																M-73	-18.2389	631.187	2829.93	0.383132
																																B-9	-18.2141	633.049	2217.94	0.410525
																																P-95	-18.5392	620.976	3025.89	0.393459
																																H-42	-18.0404	637.642	2945.91	0.364609
																																G-37	-18.7327	616.161	2161.1	0.447922
																																C-15	-18.4667	623.664	2833.36	0.397947
																																B-11	-18.0433	638.198	2562.64	0.382874
																																C-18	-18.8241	612.215	2775.73	0.424242
																																G-38	-19.1111	603.403	2624.65	0.45055
																																N-82	-18.2229	631.534	2940.23	0.376838
[truncated: 45 more columns]

## Sheet: Translate from dQFM
	USER INPUT
	dQFM (high T)	-0.2
	Temp (°C)	1000
	P (bars)	10000
	OUTPUTS
	fO2 abs value	-10.3131
	Temp (K)	1273.15
	BUFFER VALUES AT GIVEN T			fO2 IN TERMS OF GIVEN BUFFER
	Buffer	logfO2		Buffer	Δ
	QIF (Low T)	-15.3838		QIF (Low T)	5.07074
	QIF (High T)	-15.3025		QIF (High T)	4.98946
	IW	-14.4574		IW	4.14431
	WM	-12.1045		WM	1.79145
	IM	-13.9653		IM	3.65226
	CoCoO	-11.4087		CoCoO	1.09567
	FMQ (Low T)	-9.71286		FMQ (Low T)	-0.600201
	FMQ (High T)	-10.1131		FMQ (High T)	-0.2
	NNO	-9.86008		NNO	-0.452981
	MH (Low T)	-5.54788		MH (Low T)	-4.76518
	MH (Med T)	-5.17306		MH (Med T)	-5.14
	MH (High T)	-5.4794		MH (High T)	-4.83366

## Sheet: Translate from dNNO
	USER INPUT
	dQFM (high T)	-0.2
	Temp (°C)	1000
	P (bars)	10000
	OUTPUTS
	fO2 abs value	-10.0601
	Temp (K)	1273.15
	BUFFER VALUES AT GIVEN T			fO2 IN TERMS OF GIVEN BUFFER
	Buffer	logfO2		Buffer	Δ
	QIF (Low T)	-15.3838		QIF (Low T)	5.32372
	QIF (High T)	-15.3025		QIF (High T)	5.24244
	IW	-14.4574		IW	4.39729
	WM	-12.1045		WM	2.04443
	IM	-13.9653		IM	3.90524
	CoCoO	-11.4087		CoCoO	1.34865
	FMQ (Low T)	-9.71286		FMQ (Low T)	-0.34722
	FMQ (High T)	-10.1131		FMQ (High T)	0.052981
	NNO	-9.86008		NNO	-0.2
	MH (Low T)	-5.54788		MH (Low T)	-4.5122
	MH (Med T)	-5.17306		MH (Med T)	-4.88702
	MH (High T)	-5.4794		MH (High T)	-4.58068

## Sheet: Equilibrium Parameters
Buffer	A	B	C
QIF (Low T)	-29435.7	7.391	0.044
QIF (High T)	-29520.8	7.492	0.05
IW	-27489	6.702	0.055
WM	-32807	13.012	0.083
IM	-28690.6	8.13	0.056
CoCoO	-24332.6	7.295	0.052
FMQ (Low T)	-26455.3	10.344	0.092
FMQ (High T)	-25096.3	8.735	0.11
NNO	-24930	9.36	0.046
MH (Low T)	-25497.5	14.33	0.019
MH (Med T)	-26452.6	15.455	0.019
MH (High T)	-25700.6	14.558	0.019
